# Supplementary material for: Oxygen-deficient MoO3−x evoked synergistic photo-thermal catalytic CO2 reduction over g-C3N4
Source: Royal Society of Chemistry journal article supplement (doi:10.1039/d2cy01944b), 2023-01-01
Supplement: d2cy01944b1.pdf [file d2cy01944b1.pdf]

## ***Supporting Information***

### **Oxygen-deficient MoO<sub>3-x</sub> evoked synergistic photo-thermal catalytic CO<sub>2</sub> reduction over g-C<sub>3</sub>N<sub>4</sub>**

Fengyun Su,<sup>a</sup> Zhishuai Wang,<sup>a</sup> Hailong Cao<sup>a</sup>, Haiquan Xie<sup>a</sup>, Wenguang Tu,<sup>\*b</sup>  
Yonghao Xiao<sup>c</sup>, Shukui Shi,<sup>a</sup> Jiaqi Chen,<sup>a</sup> Xiaoli Jin,<sup>a</sup> Xin Ying Kong<sup>\*c</sup>

<sup>a</sup> Engineering Technology Research Center of Henan Province for Solar Catalysis;  
College of Chemistry and Pharmaceutical Engineering, Nanyang Normal University,  
Nanyang 473061, P. R. China.

<sup>b</sup> School of Science and Engineering, The Chinese University of Hong Kong,  
Shenzhen, Guangdong 518172, P. R. China .

<sup>c</sup> Division of Chemistry and Biological Chemistry, School of Physical and  
Mathematical Sciences, Nanyang Technological University, 21 Nanyang Link,  
637371 Singapore.

#### **Corresponding author**

E-mail: SuFY0407@163.com (F. Su), [tuwenguang@cuhk.edu.cn](mailto:tuwenguang@cuhk.edu.cn) (W. Tu),  
[xinying.kong@ntu.edu.sg](mailto:xinying.kong@ntu.edu.sg) (X. Y. Kong)

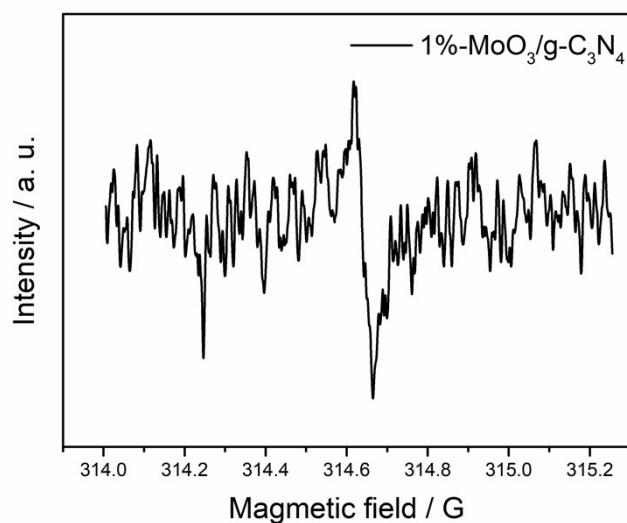

**Figure S1** EPR spectrum of 1%-MoO<sub>3</sub>/g-C<sub>3</sub>N<sub>4</sub> in the dark.

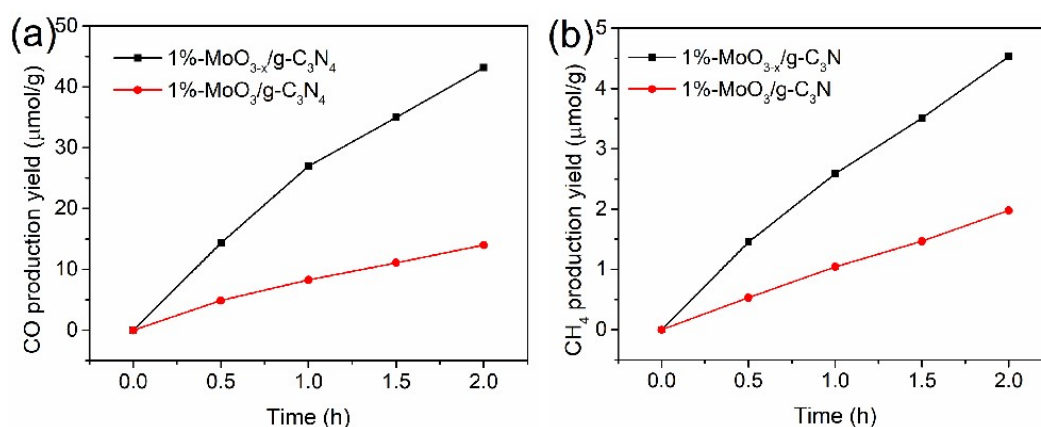

**Figure S2** Photo-thermal catalytic CO<sub>2</sub> reduction into (a) CO and (b) CH<sub>4</sub> over 1%-MoO<sub>3-x</sub>/g-C<sub>3</sub>N<sub>4</sub> and 1%-MoO<sub>3</sub>/g-C<sub>3</sub>N<sub>4</sub> under UV-Vis-IR light irradiation for 2 h.

**Table S1** Comparison of photocatalytic activity of CO<sub>2</sub> reduction over g-C<sub>3</sub>N<sub>4</sub>-based materials reported in the literature.

| Photocatalytic Materials                             | Light Source  | CH <sub>4</sub> Production rate | CO Production rate | Ref.      |
|------------------------------------------------------|---------------|---------------------------------|--------------------|-----------|
| MoO <sub>3-x</sub> / g-C <sub>3</sub> N <sub>4</sub> | 300 W Xe lamp | 4.53μmol/g/h                    | 43.15μmol/g/h      | This work |

|                                                                  |               |                |                |     |
|------------------------------------------------------------------|---------------|----------------|----------------|-----|
| g-C <sub>3</sub> N <sub>4</sub> /Cu <sub>2</sub> O@Cu            | 300 W Xe lamp | 3.1 μmol/g/h   | 10.8 μmol/g/h  | [1] |
| CeO <sub>2</sub> /3D g-C <sub>3</sub> N <sub>4</sub>             | 300 W Xe lamp | 3.03 μmol/g/h  | 4.69 μmol/g/h  | [2] |
| W <sup>6+</sup> /g-C <sub>3</sub> N <sub>4</sub>                 | 300 W Xe lamp | 4.45 μmol/g/h  | 5.75 μmol/g/h  | [3] |
| Cu <sub>2-x</sub> S/g-C <sub>3</sub> N <sub>4</sub>              | 300 W Xe lamp | 23.7 μmol/g/h  | 319.4 μmol/g/h | [4] |
| NiO/g-C <sub>3</sub> N <sub>4</sub>                              | 300 W Xe lamp | 1.79 μmol/g/h  | 2.75 μmol/g/h  | [5] |
| FeV <sub>2</sub> O <sub>4</sub> /g-C <sub>3</sub> N <sub>4</sub> | 300 W Xe lamp | 0.715 μmol/g/h | 9.58 μmol/g/h  | [6] |

## References

- [1] B. L. Dai, W. Zhao, W. Wei, J.H. Cao, G. Yang, S.J. Li, C. Sun, D.Y. Leung, Photocatalytic reduction of CO<sub>2</sub> and degradation of Bisphenol-S by g-C<sub>3</sub>N<sub>4</sub>/Cu<sub>2</sub>O@Cu S-scheme heterojunction: Study on the photocatalytic performance and mechanism insight. *Carbon*, 193 (2022) 272-284.
- [2] X. X. Zhao, J. R. Guan, J. Z. Li, X. Li, H. Q. Wang, P. W. Huo, Y. S. Yan, CeO<sub>2</sub>/3D g-C<sub>3</sub>N<sub>4</sub> heterojunction deposited with Pt cocatalyst for enhanced photocatalytic CO<sub>2</sub> reduction. *Applied Surface Science*, 537 (2021) 147891.
- [3] Y. J. Liang, X. Wu, X. Y. Liu, C. H. Li, S. W. Liu, Recovering solar fuels from photocatalytic CO<sub>2</sub> reduction over W<sup>6+</sup>-incorporated crystalline g-C<sub>3</sub>N<sub>4</sub> nanorods by synergetic modulation of active centers. *Applied Catalysis B: Environmental*, 304 (2022) 120978.
- [4] L. S. Jiang, K. Wang, X. Y. Wu, and G. K. Zhang, Highly Enhanced Full Solar Spectrum-Driven Photocatalytic CO<sub>2</sub> Reduction Performance in Cu<sub>2-x</sub>S/g-C<sub>3</sub>N<sub>4</sub> Composite: Efficient Charge Transfer and Mechanism Insight. *Solar RRI*, 5 (2021) 2000326.
- [5] L. X. Wang, Y. L. Dong, J. Y. Zhang, F. F. Tao, J. J. Xu, Construction of NiO/g-C<sub>3</sub>N<sub>4</sub> pn heterojunctions for enhanced photocatalytic CO<sub>2</sub> reduction. *Journal of Solid State Chemistry*, 308 (2022) 122878.
- [6] X. Zhao, D. F. Han, M. J. Dai, Y. Y. Fan, Z. X. Wang, D. X. Han, L. Niu, Direct Z-scheme FeV<sub>2</sub>O<sub>4</sub>/g-C<sub>3</sub>N<sub>4</sub> binary catalyst for highly selective reduction of carbon dioxide. *Chemical Engineering Journal*, 436 (2022) 132051.
